# Supplementary material for: Identification and Validation of Reference Genes for RT-qPCR Analysis in Switchgrass under Heavy Metal Stresses
Source: PubMed Central journal article supplement (PMC7291066; doi:10.3390/genes11050502), 2020-05-03
Supplement: genes-11-00502-s001.pdf [file genes-11-00502-s001.pdf]

## Supplementary Materials

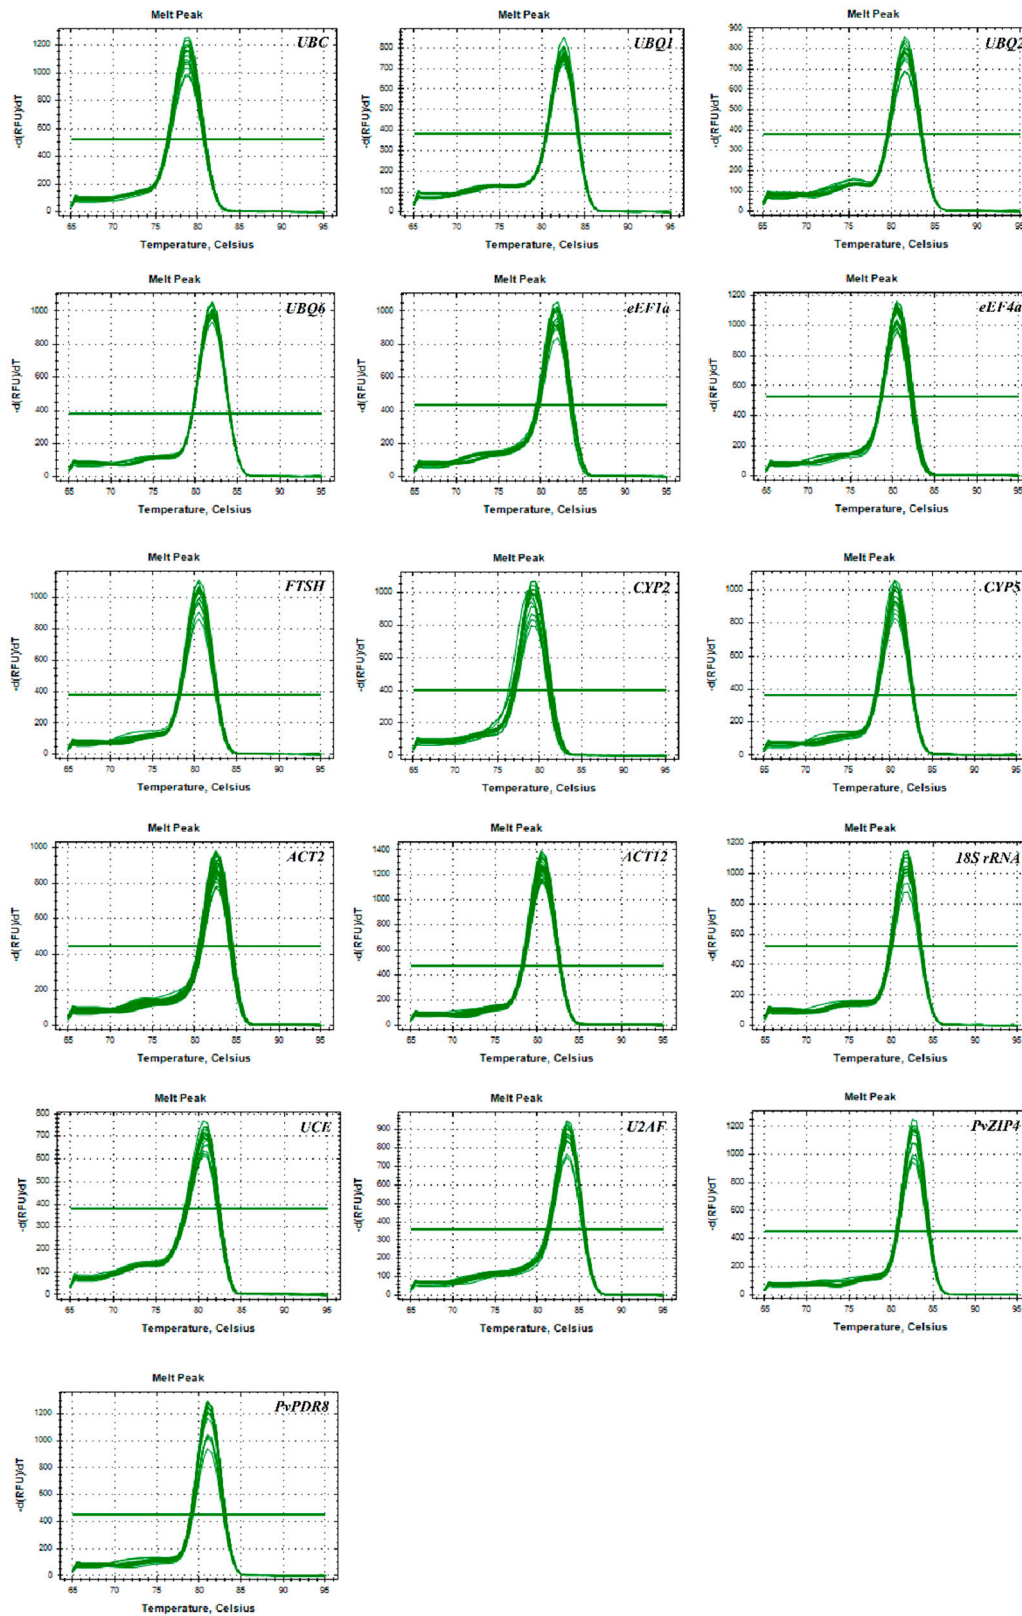

Figure S1. Melting curves for fourteen candidate reference genes.

**Table S1.** Reference genes and primer sequences.

| Gene name       | Gene description                          | GeneBank accession | 5'-Primer Sequences (Forward/Reverse)-3'      | Amplicon Length (bp) |
|-----------------|-------------------------------------------|--------------------|-----------------------------------------------|----------------------|
| <i>18S rRNA</i> | 18S ribosomal RNA1                        | GR878775           | CTACCACATCCAAGGAAG/CAATTACCAGACACTAACG        | 105                  |
| <i>ACT12</i>    | Actin 12                                  | GR878265           | CAGCCATCCATGATCGGTATG/TGCCGTACAGGTCCTTTCTGA   | 100                  |
| <i>ACT2</i>     | Actin 2                                   | FL724919           | GCGAGCTTCCCTGTAGGTA/CGAACCCAGCCTTCACCATAC     | 93                   |
| <i>CYP2</i>     | Cyclophilin 2                             | FL942644           | CTCAGACCACCTCTCAGA/CGTTCCTCCTTCGTTTCAT        | 78                   |
| <i>CYP5</i>     | Cyclophilin 5                             | FE633090           | CACTACAAGGAAGCACATTCCA/TTCACCACCCCTTCCATCAC   | 90                   |
| <i>eEF1a</i>    | Eukaryotic elongation factor 1-a          | GR876801           | CGGTTGGTTCGTGTGGAGACT/TGGTGCATCTCAACAGACTTCAC | 100                  |
| <i>eEF4a</i>    | Eukaryotic initiation factor 4a           | GR877213           | TGATGTCATTACGCAAGCACAA/GGCATTCAACCAGGCCATAG   | 95                   |
| <i>FTSH4</i>    | Ftsh protease 4                           | FL791612           | TGGATGGCTTTAAGCAGAATGA/CAAAACGCCCAGGTCTGACT   | 95                   |
| <i>U2AF</i>     | Splicing factor U2af                      | FL907910           | GGGTCAACTGCCCTTTTTACTTC/AGCACAAGAGTCGGCGATATG | 100                  |
| <i>UBC</i>      | Ubiquitin-conjugating enzyme              | GR879761           | ATCAACAGCAATGGAAGTATATG/GGAGAGCAGGACCTTAGA    | 84                   |
| <i>UBQ1</i>     | Ubiquitin 1                               | FL955474           | CAGCGAGGGCTCAATAATTCCA/TCTGGCGGACTACAATATCCA  | 82                   |
| <i>UBQ2</i>     | Ubiquitin 2                               | FL920273.1         | TTCGTGGTGGCCAGTAAG/AGAGACCAGAAGACCCAGGTACAG   | 83                   |
| <i>UBQ6</i>     | Ubiquitin 6                               | FE609298           | AGAAGCGCAAGAAGAAGACG/CCACCTTGTAAGACTGGAGCA    | 93                   |
| <i>UCE</i>      | Ubiquitin-conjugating enzyme 2            | GR879053           | TATATGACGGAGGCTACT/CAGGTGGATGAAGAATAGA        | 147                  |
| <i>PvZIP4</i>   | Zinc/iron regulated transporter protein 4 | Pavir.J08901       | GTGGTTCCATAGGTGAGATGTT/TAGAGGACCAGCCACAGTAA   | 163                  |
| <i>PvPDR8</i>   | Pleiotropic drug resistance 8             | PTHR19241          | CTCTTCTCGGGCTTCTTCATTC/ACCTCTCCAGGTCTCCATATT  | 128                  |

**Table S2.** Ct value for fourteen candidate reference genes under different heavy metal stresses.**Cd Leaf**

| <i>UBQ1</i> | <i>UBQ2</i> | <i>UBQ6</i> | <i>FTSH4</i> | <i>CYP2</i> | <i>UCE</i> | <i>eEF1a</i> | <i>eEF4a</i> | <i>CYP5</i> | <i>18Sr</i> | <i>U2AF</i> | <i>UBC</i> | <i>ACT2</i> | <i>ACT12</i> |
|-------------|-------------|-------------|--------------|-------------|------------|--------------|--------------|-------------|-------------|-------------|------------|-------------|--------------|
| 22.31       | 18.41       | 22.61       | 24.38        | 31.6        | 21.83      | 22.31        | 30.35        | 21.93       | 10.64       | 24.27       | 21.02      | 28.97       | 20.25        |
| 22.4        | 18.91       | 23.83       | 23.88        | 32.87       | 21.65      | 21.38        | 29.88        | 22.58       | 10.41       | 24          | 20.4       | 29.08       | 20.01        |
| 21.63       | 19.26       | 22.06       | 23.74        | 31.34       | 21.62      | 21.36        | 29.56        | 21.73       | 10.18       | 24.02       | 20.44      | 27.46       | 20.25        |
| 20.88       | 18.2        | 23.25       | 23.13        | 29.85       | 20.9       | 20.17        | 29.43        | 20.57       | 10.09       | 23.13       | 19.83      | 29.54       | 19.25        |
| 22.6        | 18.92       | 22.55       | 23.78        | 31.95       | 22.07      | 22.1         | 29.99        | 22.56       | 9.6         | 23.94       | 20.85      | 31.13       | 20.36        |
| 21.58       | 19.15       | 21.43       | 23.27        | 30.12       | 21.86      | 20.65        | 28.81        | 21.42       | 9.49        | 23.65       | 21.06      | 31.05       | 20.22        |
| 21          | 17.83       | 21.23       | 23.5         | 31.12       | 21.48      | 20.37        | 28.21        | 21.38       | 9.3         | 23.38       | 20.28      | 31.57       | 19.87        |
| 20.79       | 18.56       | 20.67       | 23.86        | 23.63       | 21.85      | 20.71        | 28.85        | 21.63       | 9.69        | 23.43       | 21.07      | 30.32       | 19.69        |
| 20.16       | 18.24       | 22.65       | 23.54        | 30.48       | 21.27      | 20.06        | 27.94        | 20.81       | 9.45        | 23.25       | 20.7       | 28.77       | 19.26        |
| 21.67       | 19.48       | 20.53       | 24.15        | 25.34       | 22.09      | 21.23        | 29.04        | 22.5        | 9.6         | 24.05       | 21.16      | 29.17       | 20.41        |
| 21.09       | 18.55       | 24.1        | 23.59        | 31.16       | 21.71      | 20.08        | 27.75        | 20.81       | 9.11        | 23.23       | 20         | 27.44       | 19.83        |
| 22.23       | 18.44       | 22.35       | 24.16        | 31.15       | 21.75      | 22.39        | 30.42        | 22.09       | 10.33       | 24.15       | 20.89      | 29.34       | 20.31        |
| 22.36       | 19.02       | 23.69       | 23.63        | 32.24       | 21.66      | 21.07        | 29.77        | 22.89       | 10.36       | 24.03       | 20.31      | 31.15       | 20.01        |
| 21.44       | 19.15       | 22.86       | 23.66        | 30.89       | 21.53      | 21.12        | 29.47        | 21.97       | 10.32       | 23.89       | 20.32      | 30.31       | 20.23        |
| 20.96       | 18.24       | 21.68       | 22.91        | 29.73       | 20.99      | 20.2         | 29.29        | 20.76       | 10.11       | 23.13       | 19.86      | 31.1        | 19.29        |
| 22.56       | 19.04       | 21.71       | 23.39        | 32.32       | 21.92      | 21.84        | 30.12        | 22.64       | 9.76        | 23.99       | 20.95      | 29.64       | 20.4         |
| 21.62       | 19.18       | 20.87       | 23.12        | 30.31       | 21.77      | 20.47        | 28.82        | 21.66       | 9.55        | 23.53       | 21.06      | 29.41       | 20.25        |
| 20.74       | 17.94       | 23.1        | 23.09        | 31.29       | 21.49      | 20.15        | 28.15        | 21.23       | 9.38        | 23.55       | 20.39      | 28.61       | 19.84        |
| 20.66       | 18.62       | 20.54       | 23.57        | 23.54       | 21.81      | 20.42        | 29.13        | 21.6        | 9.84        | 23.39       | 20.98      | 28.75       | 19.72        |

**Pb Leaf**

| <i>UBQ1</i> | <i>UBQ2</i> | <i>UBQ6</i> | <i>FTSH4</i> | <i>CYP2</i> | <i>UCE</i> | <i>eEF1a</i> | <i>eEF4a</i> | <i>CYP5</i> | <i>18Sr</i> | <i>U2AF</i> | <i>UBC</i> | <i>ACT2</i> | <i>ACT12</i> |
|-------------|-------------|-------------|--------------|-------------|------------|--------------|--------------|-------------|-------------|-------------|------------|-------------|--------------|
| 21.09       | 18.03       | 23.05       | 23.97        | 25.77       | 21.31      | 21.23        | 28.56        | 22.01       | 9.25        | 24.22       | 21.02      | 27.71       | 20.33        |
| 20.15       | 18.22       | 21.19       | 23.28        | 31.09       | 20.88      | 20.21        | 28.29        | 20.27       | 8.92        | 23.54       | 20.18      | 27.13       | 19.75        |
| 21.19       | 18.26       | 22.6        | 23.53        | 32.19       | 20.97      | 21.62        | 29.08        | 21.03       | 9.12        | 23.94       | 20.62      | 27.11       | 19.78        |
| 21.45       | 17.54       | 23.21       | 23.05        | 23.81       | 20.47      | 21.21        | 28.69        | 21.18       | 9.14        | 23.57       | 20.16      | 29.66       | 19.76        |
| 20.75       | 18.64       | 22.76       | 23.4         | 31.25       | 21.24      | 21.84        | 28.95        | 21.05       | 9.42        | 23.92       | 21.07      | 30.92       | 20.15        |
| 21.31       | 18.46       | 21.66       | 23.76        | 31.4        | 21.49      | 20.52        | 28.44        | 21.58       | 9.07        | 23.7        | 21.41      | 28.72       | 20.24        |
| 21.07       | 18.77       | 22.3        | 23.15        | 31.62       | 21.22      | 20.43        | 28.22        | 20.84       | 9.32        | 23.79       | 21.19      | 30.22       | 19.84        |
| 20.83       | 18          | 21.65       | 22.76        | 31.52       | 21.03      | 20.36        | 27.5         | 20.61       | 8.99        | 23.22       | 21.14      | 28.13       | 19.78        |
| 20.83       | 18.46       | 21.27       | 23.42        | 23.59       | 21.17      | 21.35        | 27.51        | 20.99       | 9.2         | 23.23       | 20.98      | 28.72       | 20.06        |
| 21.38       | 19.52       | 22.49       | 23.87        | 32.54       | 21.61      | 21.67        | 27.69        | 21.54       | 9.38        | 23.55       | 21.88      | 28.71       | 20.15        |
| 21.05       | 18.03       | 22.9        | 23.96        | 25.52       | 22.26      | 21.26        | 28.96        | 22.01       | 9.44        | 23.94       | 21.06      | 27.96       | 20.4         |
| 20.25       | 18.3        | 20.83       | 23.27        | 31.03       | 20.89      | 20.05        | 28.38        | 20.28       | 9.14        | 23.45       | 20.2       | 27.43       | 19.68        |
| 21.24       | 18.2        | 22.39       | 23.53        | 32.08       | 20.89      | 21.73        | 29.02        | 21.06       | 9.1         | 23.65       | 20.36      | 26.87       | 19.74        |
| 21.48       | 17.62       | 22.96       | 22.88        | 23.91       | 20.47      | 21.19        | 28.58        | 21.28       | 9.12        | 23.31       | 20.2       | 29.22       | 19.88        |
| 20.84       | 18.81       | 22.17       | 23.23        | 31.32       | 21.12      | 21.66        | 28.92        | 21.14       | 9.37        | 23.48       | 20.95      | 31.82       | 20.29        |
| 21.17       | 18.37       | 21.55       | 23.52        | 31.78       | 21.5       | 20.56        | 28.25        | 21.52       | 9.13        | 23.67       | 21.44      | 28.24       | 20.34        |
| 20.82       | 19.04       | 21.46       | 23.09        | 31.68       | 20.76      | 20.16        | 28.13        | 21.03       | 9.05        | 23.5        | 21.2       | 29.48       | 19.88        |
| 20.71       | 18.06       | 21.2        | 22.75        | 31.45       | 20.82      | 20.16        | 27.51        | 20.65       | 9.08        | 23.03       | 21.18      | 28.28       | 19.85        |
| 20.83       | 18.55       | 21          | 23.19        | 23.58       | 20.77      | 21.14        | 27.44        | 21.04       | 8.99        | 23.05       | 20.85      | 28.61       | 20.14        |
| 21.36       | 19.55       | 22.12       | 23.81        | 32.97       | 21.48      | 21.35        | 27.65        | 21.44       | 9.41        | 23.39       | 21.66      | 29.26       | 20.26        |

**Hg Leaf**

| <i>UBQ1</i> | <i>UBQ2</i> | <i>UBQ6</i> | <i>FTSH4</i> | <i>CYP2</i> | <i>UCE</i> | <i>eEF1a</i> | <i>eEF4a</i> | <i>CYP5</i> | <i>18Sr</i> | <i>U2AF</i> | <i>UBC</i> | <i>ACT2</i> | <i>ACT12</i> |
|-------------|-------------|-------------|--------------|-------------|------------|--------------|--------------|-------------|-------------|-------------|------------|-------------|--------------|
| 21.79       | 18.24       | 22.8        | 23.82        | 24.8        | 21.17      | 21.95        | 29.5         | 22.16       | 10.09       | 24.39       | 20.74      | 28.15       | 20.58        |
| 21.49       | 18.33       | 21.54       | 23.5         | 31.57       | 21.22      | 20.57        | 28.77        | 21.28       | 10          | 23.34       | 20.81      | 28.91       | 20.25        |
| 21.69       | 18.49       | 21.75       | 23.44        | 31.12       | 21         | 20.82        | 29.35        | 21.25       | 9.66        | 23.7        | 20.52      | 28.74       | 20.57        |
| 21.64       | 19.11       | 22.24       | 23.16        | 31.02       | 21.85      | 20.83        | 29.22        | 22.13       | 9.58        | 23.9        | 21.31      | 32.09       | 21.36        |
| 20.21       | 17.84       | 20.72       | 22.36        | 22.44       | 20.95      | 19.51        | 27.91        | 20.39       | 9.09        | 23.21       | 21.39      | 30.51       | 20.22        |
| 21.6        | 18.79       | 22.25       | 23.74        | 32.76       | 21.34      | 21.48        | 28.83        | 21.77       | 9.49        | 23.65       | 21.42      | 30.13       | 20.5         |
| 21.33       | 18.91       | 21.13       | 23.27        | 21.77       | 21.08      | 20.3         | 28.71        | 20.58       | 9.28        | 23.36       | 21.46      | 31.81       | 20.15        |
| 21.92       | 18.67       | 21.72       | 23.98        | 32.3        | 20.5       | 21.63        | 28.37        | 21.16       | 9.5         | 23.39       | 20.97      | 30.45       | 20.1         |
| 21.69       | 18.99       | 22.1        | 23.51        | 24.7        | 21.55      | 21.5         | 29.11        | 22.06       | 9.47        | 23.52       | 21.94      | 31.2        | 20.69        |
| 21.89       | 19.72       | 21.82       | 23.81        | 28.27       | 21.53      | 21.53        | 27.93        | 21.39       | 9.33        | 23.59       | 22         | 30.15       | 20.74        |
| 21.57       | 18.18       | 22.95       | 23.57        | 24.88       | 21.17      | 21.95        | 28.97        | 21.85       | 10.09       | 24.51       | 20.94      | 27.87       | 20.71        |
| 21.4        | 18.27       | 21.5        | 23.35        | 31.96       | 21.26      | 20.37        | 29.19        | 21.27       | 10.07       | 23.42       | 20.66      | 27.63       | 20.39        |
| 21.52       | 18.42       | 21.73       | 23.17        | 31.27       | 20.88      | 20.66        | 28.94        | 21.11       | 9.61        | 23.8        | 20.55      | 28.67       | 20.41        |
| 21.55       | 19.15       | 22.31       | 22.3         | 31.53       | 21.6       | 21.04        | 29.16        | 21.89       | 9.58        | 23.77       | 21.45      | 32.27       | 21.31        |
| 20.06       | 18.01       | 20.68       | 23.68        | 22.05       | 20.74      | 19.51        | 27.67        | 20.16       | 8.95        | 23.2        | 21.36      | 30.55       | 20.14        |
| 21.51       | 18.75       | 22.19       | 23.2         | 32.52       | 21.07      | 21.41        | 28.41        | 21.77       | 9.44        | 23.75       | 21.38      | 29.77       | 20.71        |
| 21.18       | 18.95       | 21.19       | 23.85        | 21.41       | 21.03      | 20.34        | 28.47        | 20.42       | 9.16        | 23.38       | 21.51      | 31.63       | 20.26        |
| 21.74       | 18.69       | 21.61       | 23.31        | 32.34       | 20.47      | 21.53        | 28.02        | 21.05       | 9.52        | 23.34       | 21.04      | 29.57       | 20.19        |
| 21.41       | 18.85       | 22.14       | 23.73        | 24.47       | 21.24      | 21.67        | 28.61        | 21.95       | 9.54        | 23.55       | 21.99      | 31.73       | 20.26        |
| 21.55       | 19.64       | 21.67       | 23.4         | 32.38       | 21.44      | 21.67        | 27.48        | 21.2        | 9.02        | 23.63       | 22.2       | 29.04       | 20.68        |

**Cr Leaf**

| <i>UBQ1</i> | <i>UBQ2</i> | <i>UBQ6</i> | <i>FTSH4</i> | <i>CYP2</i> | <i>UCE</i> | <i>eEF1a</i> | <i>eEF4a</i> | <i>CYP5</i> | <i>18Sr</i> | <i>U2AF</i> | <i>UBC</i> | <i>ACT2</i> | <i>ACT12</i> |
|-------------|-------------|-------------|--------------|-------------|------------|--------------|--------------|-------------|-------------|-------------|------------|-------------|--------------|
| 21.55       | 18.16       | 22.15       | 23.8         | 24.7        | 20.91      | 21.03        | 28.76        | 21.67       | 10.67       | 23.81       | 21.04      | 27.21       | 20.79        |
| 21.89       | 19.03       | 23.25       | 23.69        | 33.1        | 20.71      | 21.55        | 28.81        | 21.44       | 10.6        | 23.5        | 20.72      | 27.17       | 20.9         |
| 23.18       | 19.45       | 24.55       | 23.91        | 25.34       | 21.13      | 22.46        | 28.29        | 22.3        | 10.04       | 24.06       | 20.95      | 27.26       | 20.42        |
| 21.94       | 17.33       | 22.56       | 23           | 30.59       | 20.79      | 20.75        | 28.31        | 22.3        | 9.26        | 24.15       | 20.55      | 28.45       | 21.3         |
| 22.13       | 18.79       | 22.1        | 23.43        | 23.57       | 20.91      | 22.17        | 30.28        | 22.66       | 9.77        | 24.06       | 21.38      | 31.74       | 20.43        |
| 20.32       | 17.88       | 23.24       | 22.9         | 30.59       | 21.69      | 19.67        | 30.14        | 22.73       | 10.34       | 23.86       | 21.72      | 29.73       | 20.43        |
| 19.37       | 18.53       | 24.39       | 22.45        | 30.68       | 20.39      | 18.61        | 28.54        | 21.35       | 10          | 24.05       | 21.19      | 30.61       | 20.52        |
| 21.14       | 17.55       | 22.51       | 22.67        | 31.05       | 20.36      | 21.15        | 28.55        | 21.39       | 9.74        | 23.6        | 20.78      | 31.58       | 20.98        |
| 21.54       | 18.55       | 23.01       | 23.66        | 24.75       | 21.01      | 21.05        | 29.25        | 21.79       | 9.12        | 23.92       | 21.16      | 27.41       | 20.57        |
| 21.86       | 19.25       | 21.56       | 23.41        | 32.18       | 20.79      | 21.78        | 29.26        | 21.92       | 8.49        | 23.56       | 20.99      | 28          | 20.29        |
| 23.17       | 19.63       | 20.58       | 23.92        | 25.19       | 21.19      | 22.6         | 27.59        | 21.02       | 8.58        | 24.57       | 21.09      | 27.41       | 20.12        |
| 22.02       | 17.47       | 23.27       | 22.77        | 30.45       | 20.7       | 20.82        | 27.54        | 21.03       | 9.72        | 23.46       | 20.69      | 28.32       | 20.44        |
| 22.14       | 18.92       | 23.13       | 23.3         | 23.66       | 21.04      | 22.16        | 28.05        | 19.48       | 9.58        | 24.12       | 21.1       | 30.24       | 20.93        |
| 20.29       | 18.04       | 22.08       | 22.56        | 31.04       | 21.78      | 19.69        | 28.23        | 19.6        | 10.34       | 24.11       | 21.93      | 29.81       | 20.94        |
| 19.6        | 18.45       | 20.67       | 22.41        | 30.22       | 20.35      | 19           | 28.78        | 20.87       | 9.78        | 23.19       | 21.41      | 31.06       | 20.9         |
| 21.2        | 17.7        | 23.55       | 22.53        | 30.71       | 20.34      | 21.15        | 28.48        | 20.95       | 9.44        | 23.21       | 21.08      | 31.64       | 20.42        |

**As Leaf**

| <i>UBQ1</i> | <i>UBQ2</i> | <i>UBQ6</i> | <i>FTSH4</i> | <i>CYP2</i> | <i>UCE</i> | <i>eEF1a</i> | <i>eEF4a</i> | <i>CYP5</i> | <i>18Sr</i> | <i>U2AF</i> | <i>UBC</i> | <i>ACT2</i> | <i>ACT12</i> |
|-------------|-------------|-------------|--------------|-------------|------------|--------------|--------------|-------------|-------------|-------------|------------|-------------|--------------|
| 22.76       | 19.37       | 24.17       | 24.18        | 25.11       | 23.6       | 23.04        | 29.79        | 22.87       | 10.58       | 25.14       | 22.02      | 28.36       | 21.28        |
| 21.39       | 18.78       | 21.76       | 24.2         | 25.16       | 23.1       | 22.77        | 29.65        | 21.17       | 10.26       | 24.44       | 20.96      | 28.48       | 20.08        |
| 22.5        | 19.15       | 22.71       | 24.71        | 32.35       | 22.05      | 22.22        | 30.11        | 22.26       | 10.71       | 24.85       | 22.01      | 28.86       | 21.27        |
| 22.13       | 18.74       | 22.19       | 23.72        | 31.52       | 21.85      | 21.94        | 30           | 21.69       | 10.58       | 24.3        | 21.49      | 30.59       | 20.71        |
| 21.3        | 18.99       | 21.09       | 23.52        | 32.27       | 22.8       | 22.15        | 28.74        | 21.14       | 10.24       | 24.33       | 22.35      | 32.92       | 20.9         |
| 21.86       | 19.33       | 22.46       | 24.55        | 32.43       | 23.01      | 22.42        | 29.39        | 21.06       | 10.1        | 24.34       | 22.51      | 30.87       | 21.04        |
| 20.67       | 18.31       | 20.62       | 23.04        | 30.8        | 22.24      | 21.25        | 27.84        | 20.44       | 9.77        | 23.43       | 21.31      | 31.2        | 20.06        |
| 21.92       | 19.05       | 21.88       | 23.26        | 31.1        | 22.25      | 21.87        | 28.49        | 21.46       | 10.13       | 24.03       | 21.66      | 29.19       | 20.73        |
| 22.82       | 19.27       | 24.12       | 24.44        | 31.2        | 22.41      | 23.37        | 29.05        | 21.65       | 10.86       | 24.49       | 22.6       | 32.76       | 21.13        |
| 21.21       | 18.68       | 21.76       | 24.58        | 31.27       | 22.48      | 22.53        | 27.53        | 21.02       | 9.23        | 23.26       | 22.11      | 29.05       | 20.27        |
| 22.42       | 19.11       | 22.79       | 24.96        | 31.98       | 22.68      | 23.26        | 29.88        | 22.93       | 11.09       | 25.11       | 22.06      | 28.28       | 21.41        |
| 22.34       | 18.58       | 22.34       | 23.91        | 32.47       | 22.91      | 22.54        | 29.3         | 21.2        | 10.67       | 24.31       | 20.94      | 28.33       | 20.04        |
| 21.35       | 18.87       | 21.16       | 23.8         | 31.17       | 21.98      | 22.41        | 30.08        | 22.27       | 11.1        | 24.76       | 21.93      | 29.22       | 21.3         |
| 21.96       | 19.11       | 22.65       | 24.66        | 30.81       | 22.24      | 22.15        | 29.59        | 21.86       | 11.39       | 24.26       | 21.43      | 31.34       | 20.84        |
| 20.39       | 18.18       | 20.96       | 23.01        | 24.69       | 22.2       | 22.1         | 28.7         | 21.25       | 10.29       | 24.16       | 22.13      | 32.77       | 21.01        |
| 21.73       | 18.98       | 22.05       | 23.48        | 24.84       | 22.52      | 22.55        | 29.27        | 21.08       | 10.32       | 24.29       | 22.46      | 30.38       | 21.16        |

**Cd Root**

| <i>UBQ1</i> | <i>UBQ2</i> | <i>UBQ6</i> | <i>FTSH4</i> | <i>CYP2</i> | <i>UCE</i> | <i>eEF1a</i> | <i>eEF4a</i> | <i>CYP5</i> | <i>18Sr</i> | <i>U2AF</i> | <i>UBC</i> | <i>ACT2</i> | <i>ACT12</i> |
|-------------|-------------|-------------|--------------|-------------|------------|--------------|--------------|-------------|-------------|-------------|------------|-------------|--------------|
| 20.01       | 17.44       | 20.75       | 23.71        | 29.39       | 21.26      | 20.80        | 28.47        | 21.17       | 9.97        | 24.10       | 22.45      | 28.72       | 20.19        |
| 20.01       | 17.32       | 20.63       | 23.62        | 29.51       | 21.52      | 20.59        | 28.49        | 21.30       | 9.94        | 24.04       | 22.52      | 29.16       | 20.30        |
| 20.14       | 16.73       | 20.52       | 24.02        | 24.75       | 21.64      | 20.21        | 28.69        | 21.04       | 10.27       | 24.05       | 22.59      | 30.05       | 20.88        |
| 19.99       | 16.78       | 20.63       | 24.06        | 24.65       | 21.46      | 20.15        | 30.58        | 21.15       | 9.97        | 24.06       | 22.57      | 29.60       | 20.92        |
| 20.15       | 16.59       | 20.50       | 23.36        | 24.14       | 21.28      | 20.62        | 28.81        | 21.60       | 10.53       | 24.29       | 22.47      | 31.20       | 20.37        |
| 20.02       | 16.66       | 20.46       | 23.24        | 24.06       | 21.46      | 20.47        | 28.79        | 21.58       | 10.42       | 24.32       | 22.49      | 31.58       | 20.52        |
| 19.82       | 17.06       | 19.67       | 23.37        | 23.45       | 21.44      | 20.39        | 28.80        | 21.20       | 11.24       | 24.42       | 22.18      | 30.02       | 19.90        |
| 19.74       | 17.14       | 19.22       | 23.35        | 23.49       | 21.65      | 20.30        | 29.00        | 21.31       | 11.15       | 24.20       | 22.19      | 29.71       | 20.11        |
| 19.52       | 16.33       | 19.05       | 22.89        | 23.99       | 20.26      | 19.95        | 28.12        | 20.25       | 10.17       | 23.19       | 21.09      | 28.96       | 20.03        |
| 19.35       | 16.28       | 19.15       | 22.92        | 24.01       | 20.45      | 19.77        | 28.29        | 20.32       | 10.04       | 23.15       | 21.19      | 28.08       | 20.33        |
| 19.76       | 16.64       | 19.67       | 23.09        | 24.21       | 20.30      | 20.79        | 28.43        | 20.83       | 10.70       | 23.46       | 21.29      | 30.37       | 20.07        |
| 19.68       | 16.57       | 19.89       | 23.05        | 24.26       | 20.59      | 20.69        | 28.50        | 20.89       | 10.58       | 23.29       | 21.35      | 29.28       | 20.14        |
| 19.75       | 16.34       | 19.80       | 23.16        | 23.68       | 20.50      | 21.13        | 29.12        | 21.05       | 11.65       | 23.83       | 21.54      | 28.61       | 20.64        |
| 19.76       | 16.40       | 20.02       | 23.23        | 23.74       | 20.76      | 21.00        | 28.95        | 21.09       | 11.44       | 23.94       | 21.52      | 27.66       | 20.80        |
| 21.06       | 17.83       | 21.45       | 24.36        | 25.68       | 21.38      | 21.49        | 28.93        | 22.08       | 11.38       | 24.32       | 22.08      | 29.51       | 20.06        |
| 21.12       | 17.75       | 21.42       | 24.36        | 25.70       | 21.23      | 21.31        | 28.92        | 21.86       | 11.11       | 24.21       | 22.00      | 30.58       | 19.86        |

**Pb Root**

| <i>UBQ1</i> | <i>UBQ2</i> | <i>UBQ6</i> | <i>FTSH4</i> | <i>CYP2</i> | <i>UCE</i> | <i>eEF1a</i> | <i>eEF4a</i> | <i>CYP5</i> | <i>18Sr</i> | <i>U2AF</i> | <i>UBC</i> | <i>ACT2</i> | <i>ACT12</i> |
|-------------|-------------|-------------|--------------|-------------|------------|--------------|--------------|-------------|-------------|-------------|------------|-------------|--------------|
| 20.25       | 17.13       | 21.15       | 23.52        | 24.77       | 21.92      | 20.18        | 27.77        | 21.40       | 9.45        | 24.03       | 22.24      | 29.05       | 19.22        |
| 20.18       | 17.20       | 21.27       | 23.56        | 24.85       | 22.04      | 20.21        | 28.05        | 21.64       | 9.85        | 24.05       | 22.21      | 28.80       | 19.28        |
| 18.90       | 16.96       | 19.05       | 22.94        | 27.61       | 20.80      | 19.27        | 27.52        | 19.30       | 8.66        | 22.76       | 21.71      | 27.25       | 23.22        |
| 18.82       | 17.09       | 19.28       | 23.01        | 27.39       | 20.64      | 19.47        | 27.34        | 19.39       | 8.68        | 22.72       | 21.74      | 27.37       | 23.38        |
| 19.90       | 17.62       | 20.42       | 23.85        | 23.94       | 21.18      | 20.14        | 28.60        | 20.80       | 9.84        | 23.92       | 22.33      | 27.02       | 19.72        |
| 19.84       | 17.61       | 20.43       | 23.73        | 23.87       | 21.29      | 20.16        | 28.39        | 20.84       | 9.63        | 23.91       | 22.13      | 27.49       | 19.73        |
| 20.03       | 18.47       | 20.42       | 24.47        | 22.94       | 21.14      | 20.30        | 28.69        | 20.82       | 10.35       | 24.41       | 22.29      | 26.29       | 19.28        |
| 19.94       | 18.56       | 20.38       | 24.37        | 22.87       | 21.24      | 20.17        | 28.63        | 20.96       | 10.07       | 24.24       | 22.27      | 26.28       | 19.57        |
| 20.02       | 17.77       | 20.10       | 23.99        | 24.08       | 20.76      | 20.13        | 28.43        | 20.44       | 10.18       | 23.69       | 21.71      | 26.60       | 19.41        |
| 19.79       | 17.99       | 20.28       | 23.86        | 24.14       | 20.81      | 19.96        | 28.73        | 20.64       | 9.99        | 23.72       | 21.73      | 26.78       | 19.48        |
| 19.17       | 17.81       | 19.33       | 24.12        | 24.42       | 20.74      | 20.09        | 28.31        | 20.06       | 9.43        | 23.61       | 22.13      | 25.85       | 18.78        |
| 19.07       | 17.92       | 19.37       | 24.10        | 24.42       | 21.01      | 19.99        | 28.28        | 20.22       | 9.35        | 23.63       | 22.03      | 26.34       | 18.53        |
| 19.48       | 18.04       | 19.29       | 25.65        | 24.27       | 21.34      | 20.75        | 29.58        | 20.27       | 11.64       | 24.33       | 22.13      | 27.41       | 19.19        |
| 19.31       | 17.91       | 19.35       | 25.59        | 24.27       | 21.37      | 20.71        | 29.72        | 20.34       | 11.66       | 24.45       | 21.92      | 27.81       | 19.47        |
| 19.95       | 17.96       | 19.74       | 24.51        | 23.02       | 21.44      | 20.30        | 28.44        | 20.57       | 11.57       | 24.02       | 21.53      | 28.08       | 19.27        |
| 20.03       | 17.81       | 19.75       | 24.43        | 23.03       | 21.50      | 20.15        | 28.36        | 20.49       | 11.14       | 24.02       | 21.58      | 28.16       | 19.20        |

**Hg Root**

| <i>UBQ1</i> | <i>UBQ2</i> | <i>UBQ6</i> | <i>FTSH4</i> | <i>CYP2</i> | <i>UCE</i> | <i>eEF1a</i> | <i>eEF4a</i> | <i>CYP5</i> | <i>18Sr</i> | <i>U2AF</i> | <i>UBC</i> | <i>ACT2</i> | <i>ACT12</i> |
|-------------|-------------|-------------|--------------|-------------|------------|--------------|--------------|-------------|-------------|-------------|------------|-------------|--------------|
| 20.87       | 17.72       | 22.77       | 25.16        | 25.23       | 21.26      | 21.68        | 28.66        | 22.27       | 10.24       | 25.11       | 22.98      | 30.50       | 22.24        |
| 20.67       | 17.61       | 22.87       | 25.14        | 24.94       | 21.25      | 21.64        | 28.97        | 22.24       | 10.27       | 24.80       | 23.40      | 30.19       | 22.34        |
| 20.89       | 17.48       | 21.23       | 25.02        | 24.43       | 21.34      | 22.10        | 29.63        | 21.46       | 10.45       | 24.75       | 23.41      | 30.69       | 20.36        |
| 20.79       | 17.57       | 21.15       | 25.11        | 24.46       | 21.40      | 21.85        | 29.34        | 21.86       | 10.33       | 24.93       | 23.25      | 30.34       | 20.39        |
| 20.91       | 17.38       | 21.16       | 26.63        | 26.34       | 21.66      | 22.15        | 29.91        | 22.06       | 10.30       | 25.18       | 23.47      | 31.08       | 22.13        |
| 20.86       | 17.24       | 21.16       | 26.38        | 26.23       | 21.74      | 22.26        | 29.79        | 22.04       | 10.39       | 25.16       | 23.42      | 32.32       | 22.17        |
| 22.17       | 17.71       | 22.49       | 27.12        | 25.74       | 22.41      | 23.13        | 30.31        | 23.03       | 10.63       | 26.00       | 24.26      | 28.47       | 20.17        |
| 22.03       | 17.75       | 22.43       | 27.02        | 25.57       | 22.33      | 23.18        | 30.59        | 23.27       | 10.66       | 25.64       | 23.99      | 29.19       | 20.46        |
| 22.32       | 18.40       | 22.49       | 25.94        | 26.33       | 22.70      | 22.63        | 30.47        | 22.96       | 11.06       | 25.53       | 24.10      | 29.01       | 20.74        |
| 22.26       | 18.41       | 22.63       | 25.89        | 26.47       | 22.69      | 22.71        | 30.80        | 22.95       | 10.87       | 25.31       | 23.97      | 28.95       | 20.93        |
| 23.54       | 19.28       | 23.45       | 27.12        | 27.75       | 23.49      | 24.00        | 31.59        | 23.95       | 12.16       | 25.96       | 24.62      | 30.25       | 21.61        |
| 23.49       | 19.30       | 23.51       | 27.06        | 27.67       | 23.59      | 24.07        | 31.92        | 23.94       | 12.05       | 26.19       | 24.60      | 30.49       | 22.31        |
| 23.33       | 19.20       | 22.99       | 28.00        | 29.62       | 23.33      | 24.25        | 31.91        | 24.09       | 12.66       | 26.26       | 24.97      | 29.41       | 21.16        |
| 23.27       | 19.17       | 23.05       | 28.08        | 29.44       | 23.24      | 24.20        | 31.75        | 24.22       | 12.58       | 26.43       | 24.39      | 29.32       | 21.27        |
| 23.92       | 19.44       | 23.30       | 29.19        | 28.12       | 24.21      | 25.07        | 32.17        | 25.13       | 13.65       | 27.31       | 25.62      | 30.90       | 20.50        |
| 23.98       | 19.50       | 23.35       | 28.98        | 27.94       | 24.42      | 24.89        | 32.28        | 25.24       | 13.41       | 27.24       | 25.79      | 30.47       | 20.50        |

**Cr Root**

| <i>UBQ1</i> | <i>UBQ2</i> | <i>UBQ6</i> | <i>FTSH4</i> | <i>CYP2</i> | <i>UCE</i> | <i>eEF1a</i> | <i>eEF4a</i> | <i>CYP5</i> | <i>18Sr</i> | <i>U2AF</i> | <i>UBC</i> | <i>ACT2</i> | <i>ACT12</i> |
|-------------|-------------|-------------|--------------|-------------|------------|--------------|--------------|-------------|-------------|-------------|------------|-------------|--------------|
| 21.33       | 17.19       | 21.35       | 24.29        | 24.78       | 22.32      | 21.18        | 28.79        | 21.99       | 10.24       | 24.79       | 23.41      | 30.99       | 21.68        |
| 21.59       | 17.25       | 21.50       | 24.37        | 24.66       | 22.53      | 21.20        | 28.78        | 22.11       | 10.65       | 24.71       | 23.51      | 30.17       | 21.15        |
| 20.96       | 17.13       | 21.21       | 24.44        | 23.57       | 22.08      | 21.56        | 29.16        | 21.78       | 10.08       | 24.25       | 23.02      | 30.80       | 20.77        |
| 21.08       | 16.84       | 21.31       | 24.17        | 23.60       | 22.10      | 21.58        | 29.15        | 21.89       | 10.23       | 24.32       | 23.19      | 31.75       | 20.89        |
| 21.44       | 17.06       | 21.26       | 24.48        | 26.33       | 22.74      | 22.19        | 29.40        | 22.55       | 10.52       | 25.00       | 23.67      | 32.93       | 20.76        |
| 21.40       | 17.04       | 21.31       | 24.36        | 26.24       | 22.52      | 22.19        | 29.29        | 22.55       | 10.45       | 24.96       | 23.86      | 32.34       | 21.10        |
| 22.05       | 17.32       | 21.53       | 24.49        | 28.41       | 22.82      | 22.27        | 30.02        | 22.70       | 11.25       | 25.62       | 23.19      | 30.86       | 21.44        |
| 22.02       | 17.42       | 21.76       | 24.55        | 28.13       | 22.53      | 22.20        | 30.16        | 22.87       | 11.13       | 25.43       | 23.06      | 31.70       | 21.54        |
| 23.13       | 18.22       | 22.50       | 24.95        | 26.19       | 22.81      | 22.52        | 30.31        | 23.37       | 11.73       | 25.50       | 23.44      | 29.92       | 20.48        |
| 23.14       | 18.44       | 22.55       | 24.79        | 26.13       | 22.61      | 22.49        | 30.36        | 23.43       | 11.31       | 25.50       | 23.44      | 30.02       | 20.68        |
| 23.22       | 18.39       | 22.49       | 24.44        | 25.82       | 23.06      | 21.83        | 30.48        | 23.63       | 12.13       | 25.48       | 23.73      | 31.52       | 20.98        |
| 23.14       | 18.31       | 22.49       | 24.39        | 25.97       | 22.78      | 21.84        | 30.44        | 23.57       | 12.04       | 25.46       | 23.59      | 31.43       | 21.01        |
| 21.55       | 17.97       | 20.84       | 24.51        | 24.85       | 22.44      | 21.38        | 29.74        | 22.16       | 12.21       | 25.03       | 23.15      | 31.14       | 20.60        |
| 21.45       | 17.84       | 21.02       | 24.59        | 24.96       | 22.03      | 21.27        | 29.66        | 22.15       | 12.18       | 25.10       | 23.00      | 31.96       | 20.96        |
| 22.34       | 18.32       | 23.01       | 24.97        | 26.13       | 22.72      | 22.31        | 29.73        | 23.61       | 11.76       | 25.96       | 23.98      | 30.08       | 21.47        |
| 22.27       | 18.39       | 23.09       | 24.76        | 26.06       | 22.98      | 22.29        | 29.75        | 23.48       | 11.45       | 25.70       | 24.01      | 30.61       | 21.35        |

**As Root**

| <i>UBQ1</i> | <i>UBQ2</i> | <i>UBQ6</i> | <i>FTSH4</i> | <i>CYP2</i> | <i>UCE</i> | <i>eEF1a</i> | <i>eEF4a</i> | <i>CYP5</i> | <i>18Sr</i> | <i>U2AF</i> | <i>UBC</i> | <i>ACT2</i> | <i>ACT12</i> |
|-------------|-------------|-------------|--------------|-------------|------------|--------------|--------------|-------------|-------------|-------------|------------|-------------|--------------|
| 21.76       | 18.36       | 22.53       | 24.09        | 31.88       | 24.95      | 21.79        | 29.30        | 22.35       | 10.82       | 24.71       | 21.58      | 30.31       | 20.09        |
| 21.69       | 18.56       | 22.44       | 24.01        | 31.60       | 24.98      | 21.69        | 29.35        | 22.64       | 11.29       | 24.80       | 21.70      | 30.61       | 19.74        |
| 21.77       | 18.29       | 22.78       | 23.37        | 28.95       | 24.42      | 22.06        | 29.57        | 22.67       | 10.69       | 24.18       | 21.54      | 30.83       | 21.07        |
| 21.61       | 18.44       | 22.46       | 23.50        | 28.87       | 24.07      | 22.20        | 29.61        | 23.03       | 10.70       | 24.06       | 21.74      | 30.81       | 21.16        |
| 22.04       | 18.46       | 22.16       | 24.59        | 26.18       | 24.21      | 22.41        | 30.01        | 22.24       | 11.31       | 24.48       | 21.87      | 30.06       | 20.50        |
| 22.05       | 18.38       | 22.15       | 24.51        | 26.75       | 24.26      | 22.46        | 29.92        | 22.26       | 11.07       | 24.50       | 21.91      | 30.03       | 21.14        |
| 21.82       | 18.06       | 21.95       | 23.71        | 25.45       | 23.42      | 22.28        | 29.47        | 21.76       | 10.80       | 24.02       | 20.55      | 30.09       | 20.28        |
| 21.76       | 18.02       | 21.89       | 23.66        | 25.51       | 23.58      | 22.19        | 29.49        | 22.05       | 10.57       | 23.84       | 20.56      | 30.30       | 20.34        |
| 21.96       | 18.21       | 22.45       | 24.13        | 26.66       | 23.22      | 22.53        | 29.82        | 22.27       | 11.76       | 24.27       | 20.46      | 30.00       | 20.44        |
| 22.01       | 18.11       | 22.64       | 24.08        | 26.80       | 23.42      | 22.39        | 29.98        | 22.38       | 11.34       | 24.31       | 20.63      | 30.43       | 20.78        |
| 21.94       | 18.56       | 22.39       | 24.18        | 24.67       | 23.50      | 22.04        | 29.70        | 22.21       | 11.02       | 24.31       | 21.11      | 30.06       | 20.03        |
| 21.81       | 18.53       | 22.43       | 24.12        | 24.68       | 23.22      | 22.01        | 29.57        | 22.32       | 10.88       | 24.30       | 21.11      | 30.36       | 20.51        |
| 20.74       | 18.06       | 21.42       | 24.03        | 24.40       | 23.53      | 21.47        | 28.84        | 21.45       | 11.92       | 23.67       | 20.29      | 30.74       | 18.83        |
| 20.60       | 18.16       | 21.37       | 24.05        | 24.38       | 23.41      | 21.31        | 28.98        | 21.48       | 11.93       | 23.73       | 20.24      | 31.12       | 19.19        |
| 21.09       | 18.71       | 21.58       | 25.09        | 26.27       | 23.77      | 22.20        | 29.35        | 22.02       | 12.15       | 24.52       | 20.55      | 29.83       | 20.30        |
| 21.29       | 18.75       | 21.53       | 25.15        | 26.16       | 23.52      | 22.04        | 29.31        | 21.80       | 11.62       | 24.39       | 20.64      | 30.69       | 20.36        |
